# Supplementary material
Source: PubMed Central journal article supplement (PMC307549)
Supplement: mbc_15_1_310__1.pdf [file mbc_15_1_310__1.pdf]

Supplementary Table 1. Raw data and calculations for one of the experiments shown in Fig. 5E

|    | Phase                                  | Dividing cells         |                    |                         |                    |                         |                    | Cells at G1             |                    |
|----|----------------------------------------|------------------------|--------------------|-------------------------|--------------------|-------------------------|--------------------|-------------------------|--------------------|
|    | Source                                 | Buds                   |                    | Mother cells            |                    | Whole cells             |                    | Whole cells             |                    |
|    | mtDNA                                  | total                  | monomeric          | total                   | monomeric          | total                   | monomeric          | total                   | monomeric          |
|    | Counted species on gel                 | Sall-produced monomers | untreated monomers | Sall- produced monomers | untreated monomers | Sall- produced monomers | untreated monomers | Sall- produced monomers | untreated monomers |
| 1  | <sup>14</sup> C gloss: [G]             | 285.14                 | 138.08             | 450.02                  | 193.74             | 475.97                  | 163.37             | 341.04                  | 73.96              |
| 2  | <sup>14</sup> C above: [A]             | -                      | 78.87              | -                       | 207.71             | -                       | 138.53             | -                       | 67.66              |
| 3  | <sup>14</sup> C below: [B]             | -                      | 77.34              | -                       | 157.61             | -                       | 127.38             | -                       | 60.79              |
| 4  | <sup>14</sup> C background: [bkg]      | 24.89                  |                    |                         |                    |                         |                    |                         |                    |
| 5  | <sup>14</sup> C net of monomeric mtDNA | -                      | 59.98              | -                       | 11.08              | -                       | 30.42              | -                       | 9.74               |
| 6  | <sup>14</sup> C net of Sall-monomers   | 260.25                 | -                  | 425.13                  | -                  | 451.08                  | -                  | 316.15                  | -                  |
| 7  | <sup>32</sup> P gloss                  | 7810.77                | 5516.19            | 16170.95                | 12011.49           | 16917.75                | 13647.54           | 27740.76                | 26490.56           |
| 8  | <sup>32</sup> P above                  | -                      | 3359.58            | -                       | 8283.20            | -                       | 9137.41            | -                       | 16282.34           |
| 9  | <sup>32</sup> P below                  | -                      | 3720.60            | -                       | 6847.10            | -                       | 8306.70            | -                       | 16125.23           |
| 10 | <sup>32</sup> P background             | 143.21                 |                    |                         |                    |                         |                    |                         |                    |
| 11 | <sup>32</sup> P net of monomeric mtDNA | -                      | 1976.10            | -                       | 4446.34            | -                       | 4925.49            | -                       | 10286.78           |
| 12 | <sup>32</sup> P net of Sall-monomers   | 7667.56                | -                  | 16027.74                | -                  | 16774.54                | -                  | 27597.55                | -                  |
| 13 | <b><sup>14</sup>C density</b>          | <b>0.034</b>           | <b>0.030</b>       | <b>0.027</b>            | <b>0.002</b>       | <b>0.027</b>            | <b>0.006</b>       | <b>0.011</b>            | <b>0.001</b>       |
| 14 | <b>Relative <sup>14</sup>C density</b> | <b>1.26</b>            | <b>1.13</b>        | <b>0.99</b>             | <b>0.09</b>        | <b>1.00</b>             | <b>0.23</b>        | <b>0.43</b>             | <b>0.04</b>        |

Note:

- Counts of radioactivity are expressed in arbitrary unit obtained by a Fuji BAS2000 image analyzer.
- [G], a gloss count of <sup>14</sup>C or <sup>32</sup>P appearing in a sample area; [A], the count appearing in the same amount of the are just above the sample area; [B], the count appearing in the same amount of the are just below the sample area; [bkg], the counts appearing in the sample area in a lane in which DNA was not loaded.
- Lines 5 and 11: net counts of monomeric mtDNA; [Net count of monomeric mtDNA] = [G] - ([A]+[B])/2
- Lines 6 and 12: net counts of total mtDNA; [Net count of Sall-produced monomer] = [G] - [bkg]
- Line 13: <sup>14</sup>C density = [<sup>14</sup>C net count]/[<sup>32</sup>P net count]
- Line 14: [Relative <sup>14</sup>C density] = [<sup>14</sup>C density of the sample]/[<sup>14</sup>C density of total mtDNA of whole dividing cells]
